# Supplementary material
Source: publisher site journal article supplement (https://www.dovepress.com/article/554227)
Supplement: Supplementary file 1 [file Supplyment%20material.docx]

**Supplement materials**

**Supplement Fig.1 Nonlinear relationship between ONT and the unfavorable outcomes in Restricted cubic splines**.


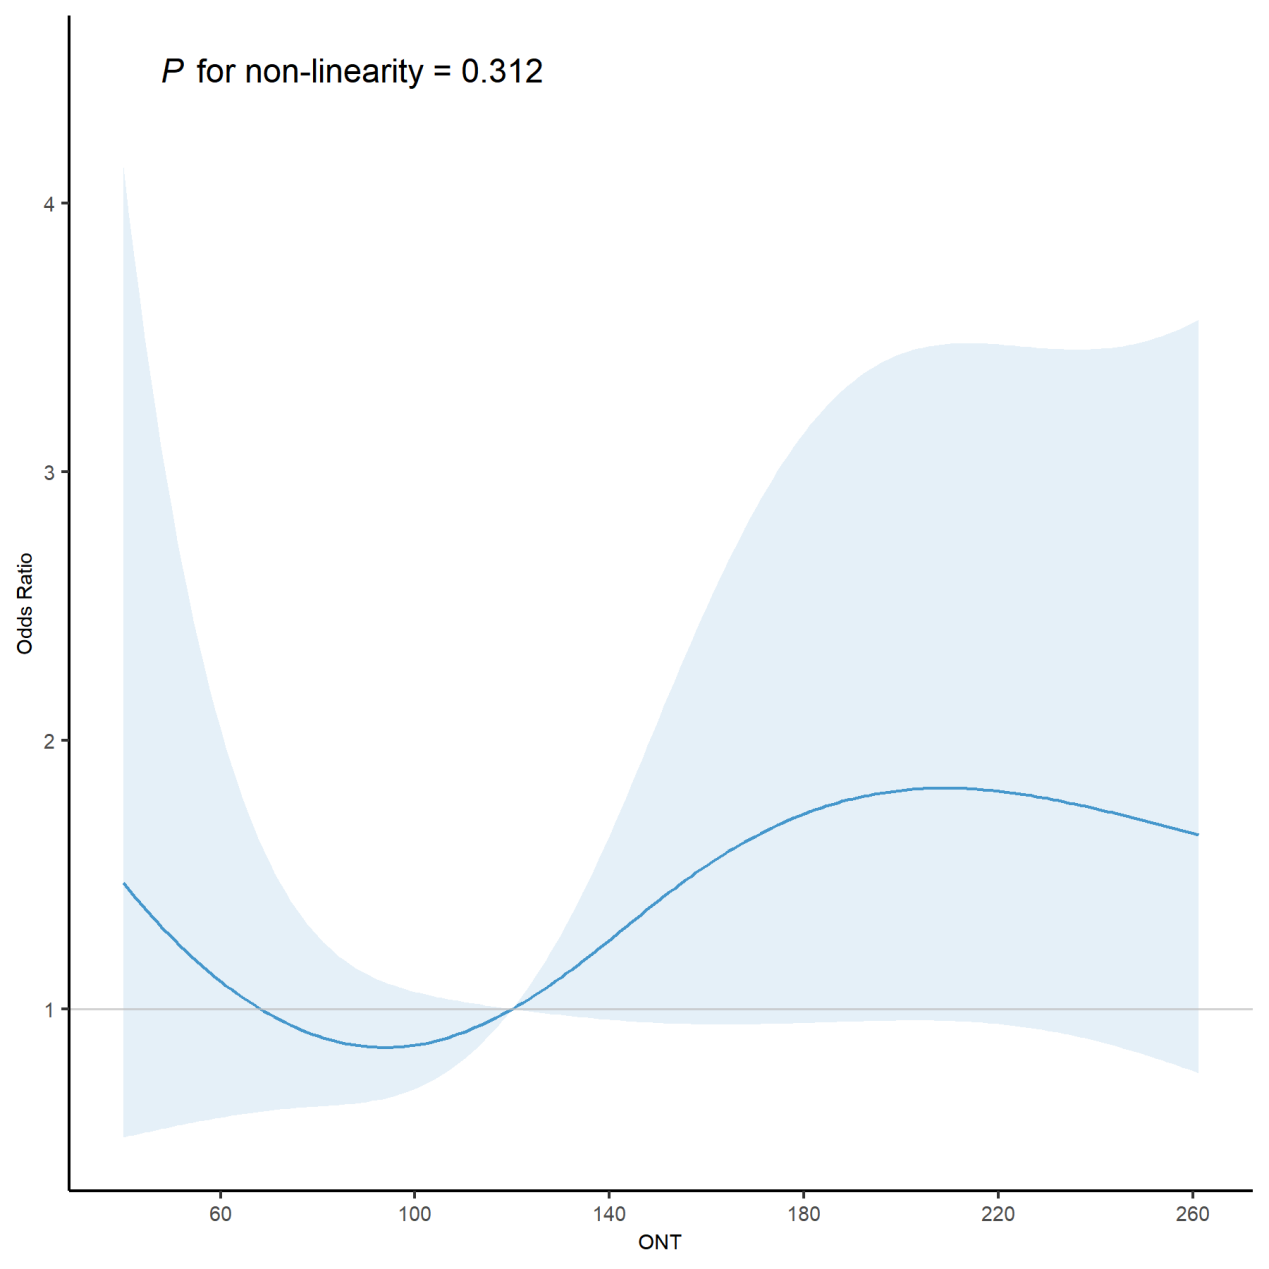


Abbreviations: Nonlinear relationship between ONT and the unfavorable outcomes in Restricted cubic splines. ONT, onset to needle.

**Supplement Fig. 2 Standardized Differences before and after Propensity-Score Matching.**


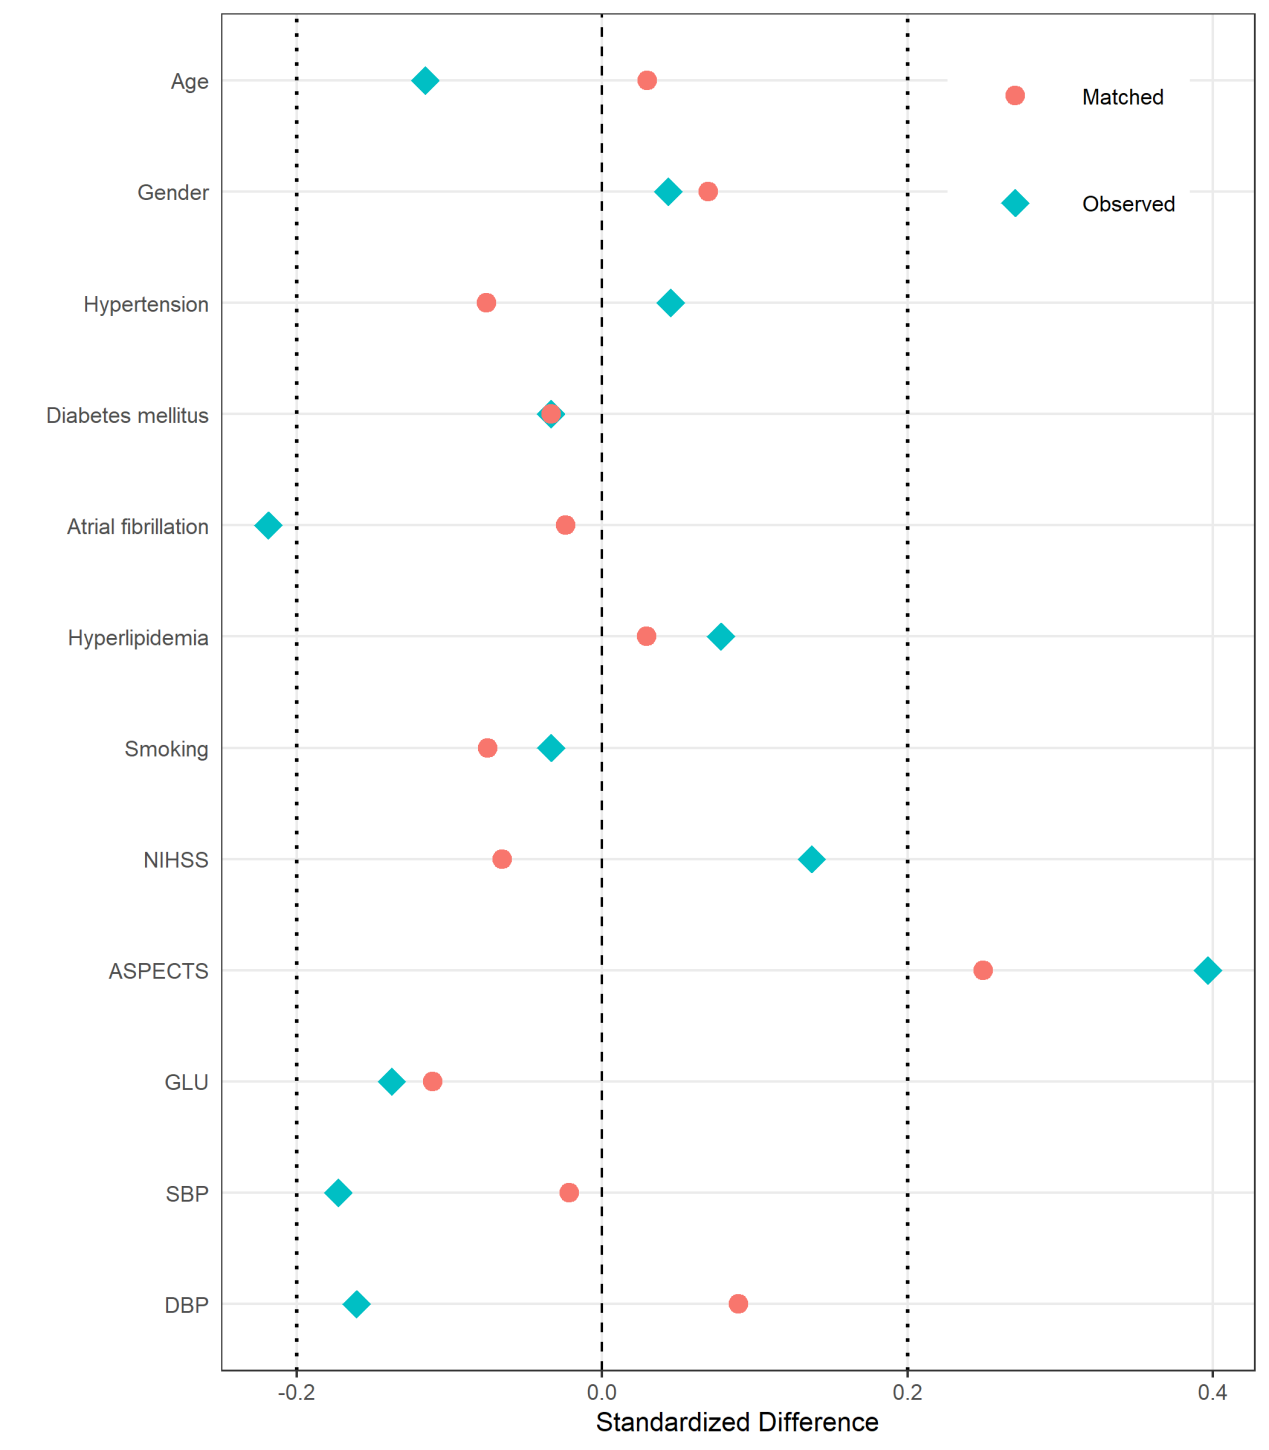


Abbreviations: Standardized differences between patients treated EVT after IVT in the early phase and in the late phase before and after propensity-score matching. ASPECTS, Alberta Stroke Program Early Computed Tomography Score; DBP, diastolic blood pressure; GLU, fasting blood glucose; NIHSS, National Institute of Health Stroke Scale; SBP, systolic blood pressure.

**Supplement Table 1. Baseline Characteristics of Patients accepting EVT after IVT according to ONT before PSM.**

|  | **Overall** | **≤2h** | **＞2h** |  |
| --- | --- | --- | --- | --- |
| Characteristics | **(n = 215)** | **(n = 99)** | **(n = 116)** | ***P* value** |
| Age, year, median (IQR) | 68.0 (60.0, 75.0) | 67.0 (58.0, 75.0) | 69.5 (61.8, 76.0) | 0.274 |
| Female, n (%) | 130 (60.5) | 61 (61.6) | 69 (59.5) | 0.858 |
| Medical history |  |  |  |  |
| Hypertension, n (%) | 154 (71.6) | 72 (72.7) | 82 (70.7) | 0.858 |
| Diabetes mellitus, n (%) | 34 (15.8) | 15 (15.2) | 19 (16.4) | 0.953 |
| Hyperlipidemia, n (%) | 42 (19.5) | 21 (21.2) | 21 (18.1) | 0.689 |
| Atrial fibrillation, n (%) | 84 (39.1) | 33 (33.3) | 51 (44.0) | 0.146 |
| Smoking, n (%) | 56 (26.0) | 25 (25.3) | 31 (26.7) | 0.929 |
| Imaging characteristics |  |  |  |  |
| ASPECTS score, median (IQR) | 9.0 (8.0, 10.0) | 9.0 (8.0, 10.0) | 9.0 (8.0, 9.3) | 0.005 |
| Occlusion site |  |  |  | 0.065 |
| ICA, n (%) | 21 (9.8) | 11 (11.1) | 10 (8.6) |  |
| MCA, n (%) | 153 (71.2) | 63 (63.6) | 90 (77.6) |  |
| Other, n (%) | 41 (19.1) | 25 (25.3) | 16 (13.8) |  |
| Stroke etiology |  |  |  | 0.522 |
| LAA, n (%) | 102 (47.4) | 47 (47.5) | 55 (47.4) |  |
| CE, n (%) | 86 (40.0) | 37 (37.4) | 49 (42.2) |  |
| Other, n (%) | 27 (12.6) | 15 (15.2) | 12 (10.3) |  |
| Clinical examination at arrival |  |  |  |  |
| NIHSS, mmHg median (IQR) | 14.0 (7.5, 17.5) | 14.0 (10.0, 17.0) | 13.0 (6.0, 18.0) | 0.467 |
| SBP, mmHg, median (IQR) | 150.0 (134.0, 160.0) | 148.0 (136.0, 157.0) | 150.0 (129.8, 163.3) | 0.189 |
| GLU, mmol/L, median (IQR) | 6.9 (5.9, 8.5) | 6.7 (5.7, 8.3) | 7.2 (6.2, 8.7) | 0.116 |
| Workflow times |  |  |  |  |
| ONT, min, median (IQR) | 130.0 (90.0, 190.0) | 85.0 (60.0, 100.0) | 180.0 (149.5, 238.5) | <0.001 |
| OTP, min, median (IQR) | 240.0 (180.0, 313.5) | 180.0 (140.0, 240.0) | 294.0 (215.0, 360.0) | <0.001 |
| PTR, min, median (IQR) | 75.0 (50.0, 110.0) | 70.0 (50.0, 110.0) | 75.0 (50.0, 110) | 0.810 |
| Outcomes |  |  |  |  |
| Recanalization, n (%) | 199 (92.6) | 94 (94.9) | 105 (90.5) | 0.330 |
| SICH, n (%) | 19 (8.8) | 5 (5.1) | 14 (12.1) | 0.117 |
| ICH, n (%) | 53 (24.7) | 20 (20.2) | 33 (28.4) | 0.215 |
| 90-day mRS, median (IQR) | 3.0 (1.0, 4 .0) | 2.0 (1.0, 3.5) | 3.0 (1.0, 4.3) | 0.003 |
| 90-day Mortality, n (%) | 30 (14.0) | 9 (9.1) | 21 (18.1) | 0.088 |
| Unfavorable Outcome, n (%) | 111 (51.6) | 42 (42.4) | 69 (59.5) | 0.018 |

Abbreviations: ASPECTS, Alberta Stroke Program Early Computed Tomography Score; CE, cardio-embolism; EVT, endovascular thrombectomy; GLU, fasting blood glucose; ICA, internal carotid artery; ICH, Intracerebral Hemorrhage; IVT, intravenous thrombolysis; LAA, Large-artery atherosclerosis; MCA, middle cerebral artery; mRS, modified Rankin Scale; NIHSS, National Institute of Health Stroke Scale; ONT, onset to needle; OTP, onset to puncture; PSM, the propensity score–matching algorithm; PTR, puncture to recanalization; SBP, systolic blood pressure; SICH, symptomatic intracranial hemorrhage.

**Supplement Table 2. Odds Ratio (95% CI) for Outcomes accepting EVT after IVT according to ONT before PSM.**

|  | **Incidence** | | **Model 1** | | **Model 2** | |
| --- | --- | --- | --- | --- | --- | --- |
| **Outcome** | **≤2h (n=99)** | **>2h(n=116)** | **OR (95% CI)** | **P value** | **OR (95% CI)** | **P value** |
| Unfavorable Outcome | 42 (42.4%) | 69 (59.5%) | 1.992 (1.16-3.451) | 0.013 | 1.912 (0.973-3.803) | 0.061 |
| Recanalization | 94 (94.9%) | 105(90.5%) | 0.508 (0.155-1.451) | 0.224 | 0.306 (0.062-1.174) | 0.109 |
| ICH | 20 (20.2%) | 33 (28.4%) | 1.57 (0.838-3.001) | 0.164 | 1.394 (0.659-3.022) | 0.390 |
| SICH | 5 (5.1%) | 14 (12.1%) | 2.58 (0.947-8.234) | 0.079 | 2.948 (0.869-11.891) | 0.099 |
| 90-day Mortality | 9 (9.1%) | 21 (18.1%) | 2.211 (0.988-5.319) | 0.062 | 2.026 (0.792-5.588) | 0.152 |

Abbreviations: ASPECTS, Alberta Stroke Program Early Computed Tomography Score; CI, confidence interval; DBP, diastolic blood pressure; EVT, endovascular thrombectomy; GLU, fasting blood glucose; ICH, Intracerebral Hemorrhage; IVT, intravenous thrombolysis; NIHSS, National Institute of Health Stroke Scale; ONT, onset to needle time; OR, odds ratio; PSM, the propensity score–matching algorithm; SBP, systolic blood pressure; SICH, symptomatic intracranial hemorrhage.

Model 1: Unadjusted.

Model 2: Adjusted for age, gender, hypertension, diabetes mellitus, atrial fibrillation, hyperlipidemia, smoking status, NIHSS score, ASPECTS score, GLU, SBP and DBP.

**Supplement Table 3. Univariable Logistic Regression of unfavorable outcome.**

|  | **OR (95% CI)** | ***P* value** |
| --- | --- | --- |
| Age | 1.040 (1.015-1.066) | 0.002 |
| Female | 1.252 (0.724-2.170) | 0.421 |
| Hypertension | 1.511 (0.834-2.760) | 0.175 |
| Diabetes mellitus | 1.895 (0.898-4.170) | 0.100 |
| Atrial fibrillation | 1.983 (1.139-3.491) | 0.016 |
| Hyperlipidemia | 0.645 (0.323-1.269) | 0.207 |
| Smoking | 0.562 (0.301-1.038) | 0.068 |
| SBP | 0.998 (0.986-1.010) | 0.730 |
| DBP | 0.994 (0.973-1.016) | 0.608 |
| NIHSS | 1.077 (1.035-1.124) | <0.001 |
| ASPECTS | 0.610 (0.469-0.778) | <0.001 |
| TOAST- CE | 1.168 (0.657-2.083) | 0.598 |
| TOAST- Other | 0.544 (0.221-1.283) | 0.171 |
| OTP | 1.001 (0.999-1.002) | 0.383 |
| PTR | 1.004 (0.999-1.010) | 0.111 |
| Thrombolysis agents | 0.628 (0.239-1.559) | 0.324 |
| General Anesthesia | 1.469 (0.635-3.533) | 0.375 |
| MCA occlusion | 0.808 (0.319-2.026) | 0.647 |
| Other occlusion | 1.958 (0.663-5.848) | 0.223 |
| Rescue Therapy | 0.944 (0.536-1.663) | 0.843 |
| GLU | 1.285 (1.139-1.475) | <0.001 |
| Creatinine | 1.005 (0.995-1.017) | 0.339 |

Abbreviations: ASPECTS, Alberta Stroke Program Early Computed Tomography Score; CE, cardio-embolism; DBP, diastolic blood pressure; GLU, fasting blood glucose; INR, international normalized ratio; MCA, middle cerebral artery; NIHSS, National Institute of Health Stroke Scale; OTP, onset to puncture; PTR, puncture to recanalization; SBP, systolic blood pressure; TOAST, Trial of Org 10172 in Acute Stroke Treatment
